# Supplementary material for: Hierarchical carbon@Ni3S2@MoS2 double core–shell nanorods for high-performance supercapacitors
Source: Royal Society of Chemistry journal article supplement (doi:10.1039/c5ta08714g), 2015-12-01
Supplement: c5ta08714g1.pdf [file c5ta08714g1.pdf]

## Supporting Information

### **Hierarchical Carbon@Ni<sub>3</sub>S<sub>2</sub>@MoS<sub>2</sub> Double Core-Shell Nanorods for High-Performance Supercapacitors**

Laiquan Li<sup>ab</sup>, Hongbin Yang<sup>b</sup>, Liping Zhang<sup>b</sup>, Jianwei Miao<sup>b</sup>, Jun Yang<sup>a</sup>, Yufei  
Zhang<sup>a</sup>, ChenCheng Sun<sup>a</sup>, Wei Huang<sup>a</sup>, Xiaochen Dong<sup>\*a</sup>, and Bin Liu<sup>\*b</sup>

<sup>a</sup>Key Laboratory of Flexible Electronics (KLOFE) & Institute of Advanced Materials  
(IAM), Jiangsu National Synergistic Innovation Center for Advanced Materials  
(SICAM), Nanjing Tech University (NanjingTech), 30 South Puzhu Road, Nanjing  
211816, China.

<sup>b</sup>School of Chemical and Biomedical Engineering, Nanyang Technological University,  
62 Nanyang Drive, Singapore 637459, Singapore.

*E-mail: Liubin@ntu.edu.sg; iamxcdong@njtech.edu.cn*

**Table S1.** Specific capacitance (F g<sup>-1</sup>) at different current densities.

| Samples         | 2 Ag <sup>-1</sup> | 4 Ag <sup>-1</sup> | 8 Ag <sup>-1</sup> | 10 Ag <sup>-1</sup> | 15 Ag <sup>-1</sup> | 20 Ag <sup>-1</sup> | 30 Ag <sup>-1</sup> | 40 Ag <sup>-1</sup> | Retention     |
|-----------------|--------------------|--------------------|--------------------|---------------------|---------------------|---------------------|---------------------|---------------------|---------------|
| <b>C@NM-300</b> | 633                | 582                | 520                | 487.5               | 446.25              | 405                 | 352.5               | 320                 | <b>50.55%</b> |
| <b>C@NM-500</b> | 1013               | 1000               | 886                | 865                 | 776.25              | 695                 | 645                 | 550                 | <b>54.27%</b> |
| <b>C@NM-700</b> | 1544               | 1500               | 1404               | 1388                | 1327                | 1280                | 1192                | 1170                | <b>75.97%</b> |
| <b>C@NM-900</b> | 1300               | 1270               | 1250               | 1220                | 1170                | 1121                | 1050.8              | 1005                | <b>77.31%</b> |

**Note 1:** “Retention” refers to the capacity at 40 A/g as compared with that at 2 A/g.

**Table S2.** Comparison of electrochemical performance of our C@Ni<sub>3</sub>S<sub>2</sub>@MoS<sub>2</sub> nanorods with the recently reported Ni<sub>3</sub>S<sub>2</sub>- and MoS<sub>2</sub>-based hybrid materials

| Materials                                                        | Capacitance (F/g)  | Rate Performance    | Capacitance retention       | Reference       |
|------------------------------------------------------------------|--------------------|---------------------|-----------------------------|-----------------|
| CNT@Ni <sub>3</sub> S <sub>2</sub>                               | 514 (4 A/g)        | 70.4% (13.3/4)      | 88% (5.3A/g, 1500)          | 1               |
| Ni <sub>3</sub> S <sub>2</sub> /rGO                              | 1015.6 (1 A/g)     | 87.9% (10/1)        | 85% (10 A/g, 1000 )         | 2               |
| NiCo <sub>2</sub> O <sub>4</sub> @Ni <sub>3</sub> S <sub>2</sub> | 1601 (2 A/g)       | 68.9% (20/2)        | 83.7% (4 A/g, 2000)         | 3               |
| Ni@rGO– Ni <sub>3</sub> S <sub>2</sub>                           | 987.8 (1.5 A/g)    | 54.3% (20/1.5)      | 97.9% (12 A/g, 3000)        | 4               |
| ZnO@Ni <sub>3</sub> S <sub>2</sub> array                         | 1529 (2 A/g)       | 80.4% (20/2)        | 42% (10 A/g, 2000)          | 5               |
| Ni <sub>3</sub> S <sub>2</sub> @Ni(OH) <sub>2</sub> /3DGN        | 1037.5 (5.1 A/g)   | 38.4% (19.8/5.1)    | 99.1% (5.9 A/g, 2000)       | 6               |
| Ni <sub>3</sub> S <sub>4</sub> @MoS <sub>2</sub>                 | 1440.9 (2 A/g)     | 55.56% (20/2)       | 90.7%(10 A/g, 3000)         | 7               |
| <b>C@Ni<sub>3</sub>S<sub>2</sub>@MoS<sub>2</sub></b>             | <b>1544 (2A/g)</b> | <b>82.9% (20/2)</b> | <b>92.8% (20 A/g, 2000)</b> | <b>Our work</b> |

**Note 2:** “514 (4 A/g)” means the capacitance is 514 F/g at 4 A/g,

“70.4% (13.3/4)” refers to the capacitance at 13.3 A/g is 70.4% of that at 4 A/g,

“88% (5.3A/g, 1500)”represents that the capacitance retention is 88% after 1500 cycles at 5.3 A/g.

**Table S3.** Weight ratio of C, S, N and H from combustion analysis.

| Samples         | C (%) | S (%) | N (%) | H (%) |
|-----------------|-------|-------|-------|-------|
| <b>C@NM-300</b> | 11.01 | 14.03 | 5.14  | 2.09  |
| <b>C@NM-500</b> | 12.89 | 15.99 | 5.03  | 1.86  |
| <b>C@NM-700</b> | 16.72 | 13.22 | 5.00  | 1.52  |
| <b>C@NM-900</b> | 15.75 | 11.77 | 5.19  | 2.13  |

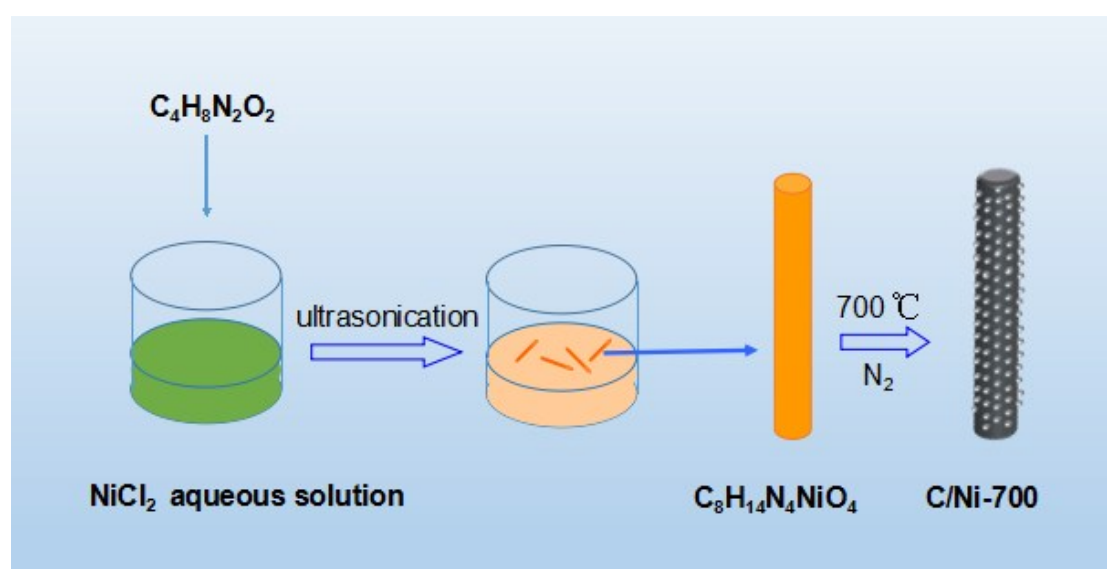

**Fig. S1** Schematic illustration to show the formation of the C/Ni-700 nanorods.

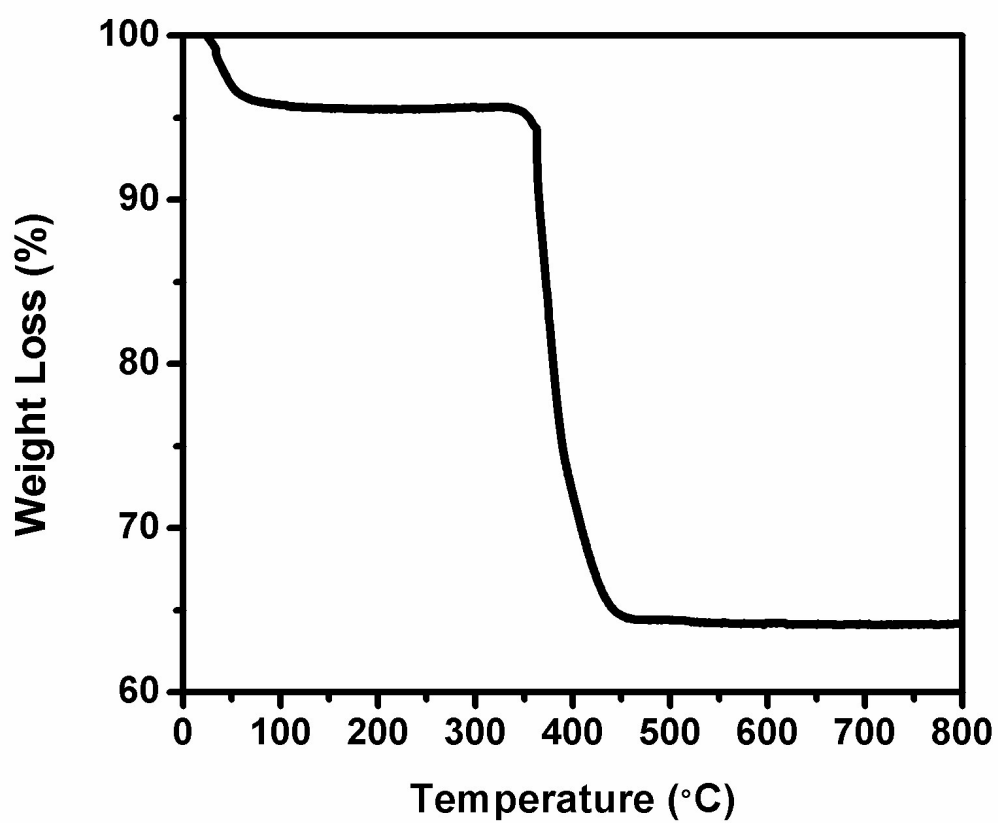

**Fig. S2** Thermogravimetric curve of C/Ni-700 nanorods.

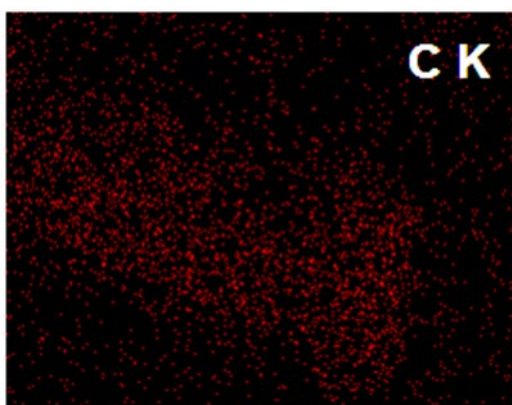

**Fig. S3** EDX elemental mapping image for carbon.

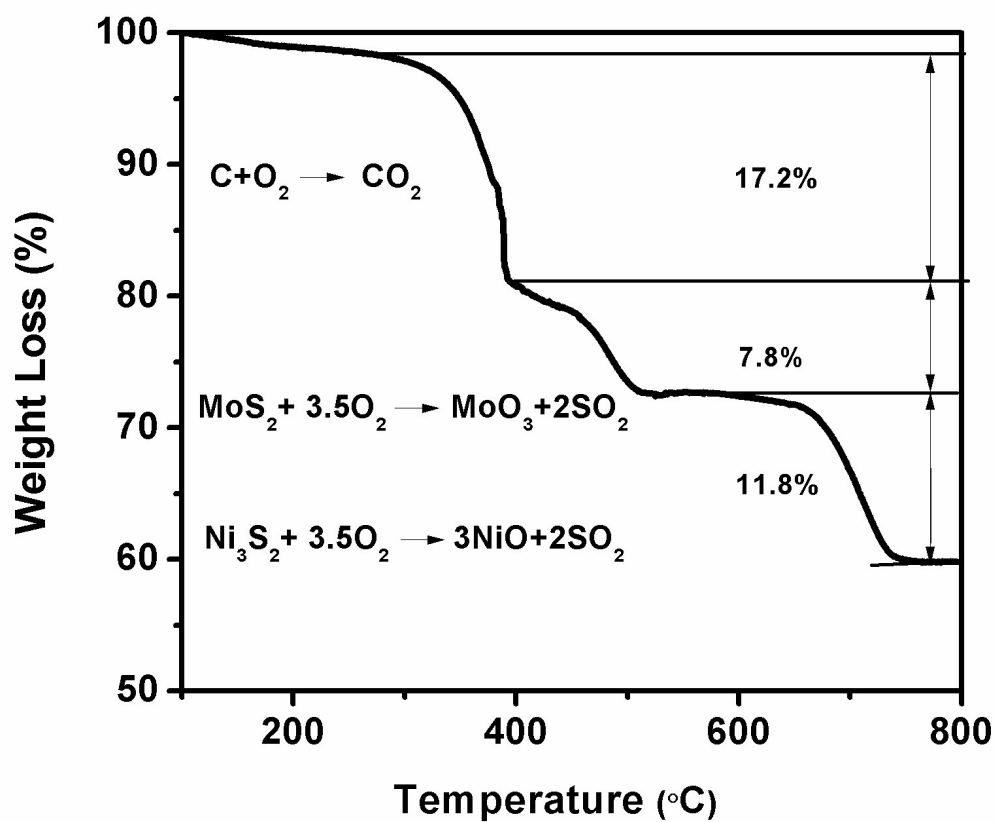

Fig. S4 Thermogravimetric curve of C@NM-700 double core-shell nanorods.

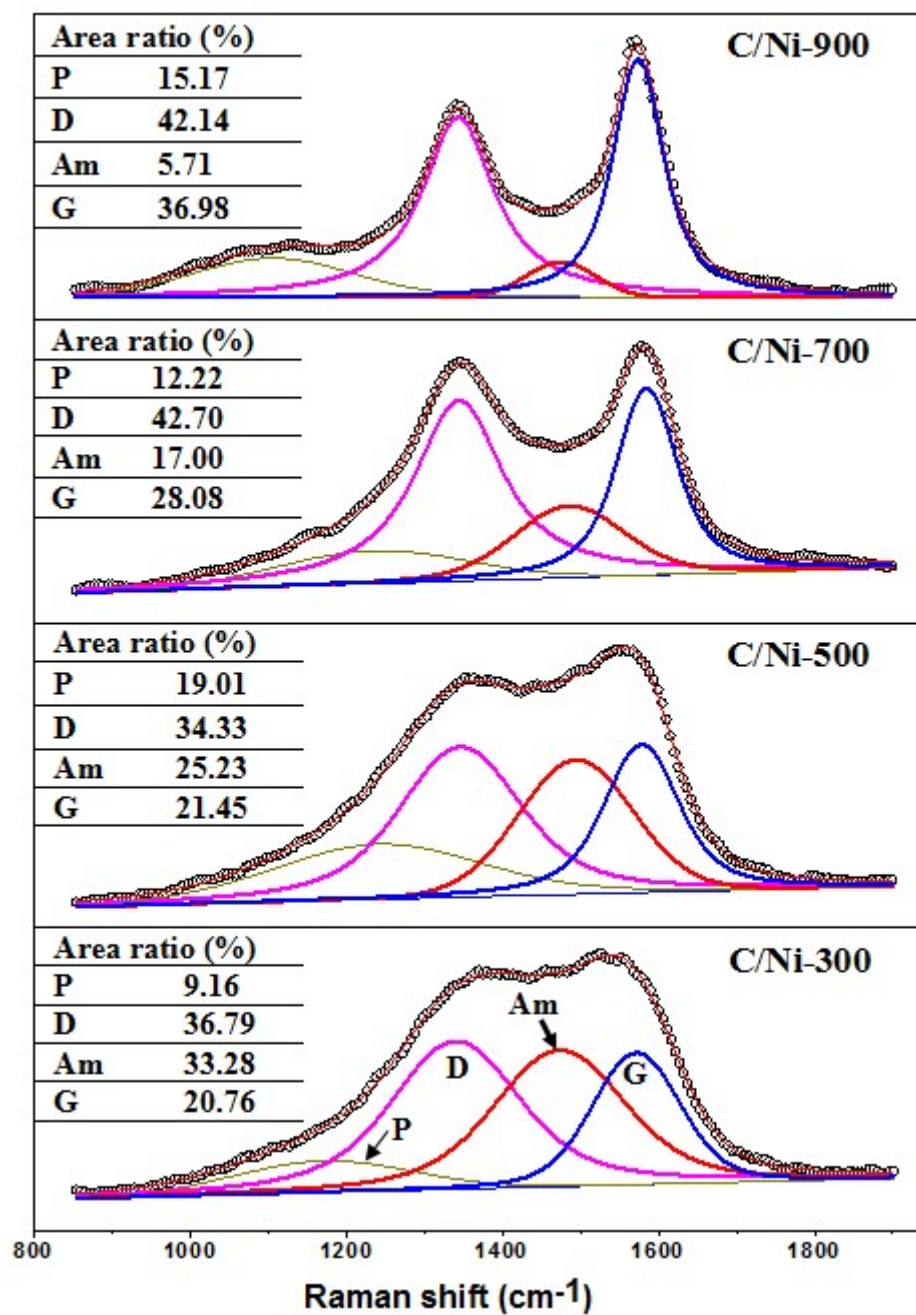

**Fig. S5** Raman spectra of C/Ni-300, C/Ni-500, C/Ni-700, and C/Ni-900 nanorods.

The insets show the ratio of (P) sp<sup>3</sup>, D (defect), Am (amorphous), G (graphite) carbon peaks.

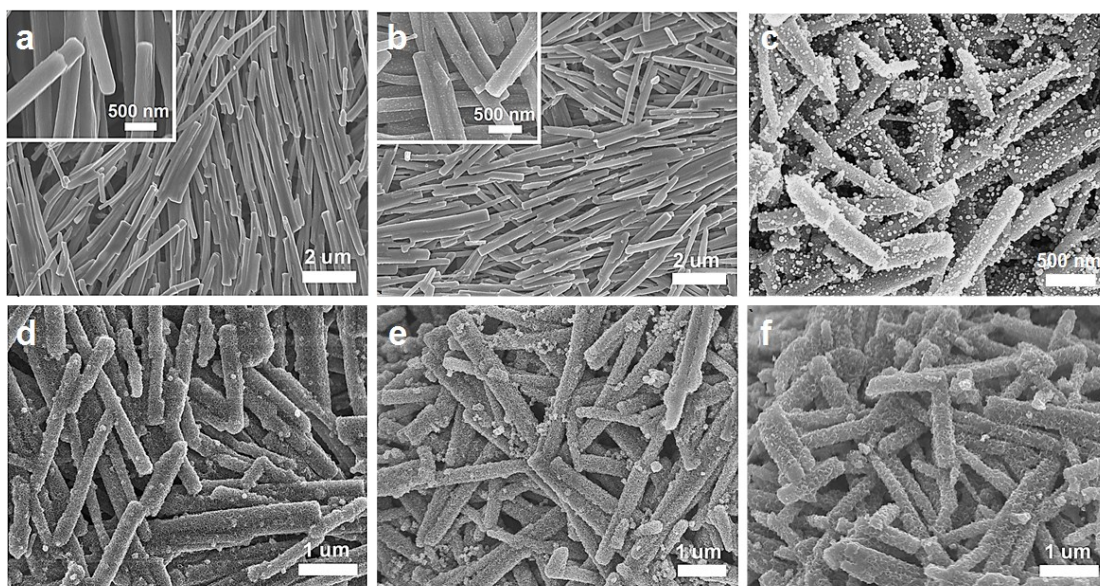

**Fig. S6** (a & d) FESEM images of C/Ni-300 and C@NM-300 nanorods, (b & e) FESEM images of C/Ni-500 and C@NM-500 nanorods, (c & f) FESEM images of C/Ni-900 and C@NM-900 nanorods.

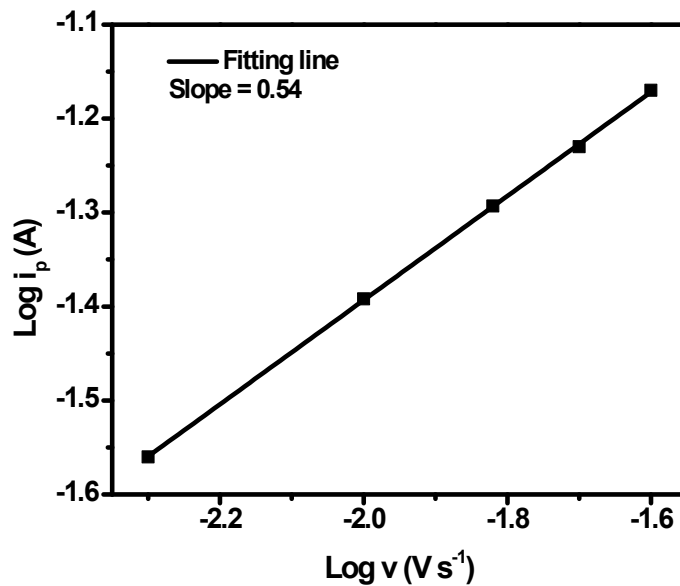

**Fig. S7**  $\text{Log}(i_p)$  vs.  $\text{log}(v)$  plot, where  $i_p$  is the peak current and  $v$  is the scan rate, respectively.

**Mode of reaction:**

For diffusion-controlled reaction, the peak current ( $i_p$ ) is proportional to the square root of the scan rate ( $v^{1/2}$ ), derived from the Randles–Sevcik equation:<sup>8</sup>

$$i_p = 2.69 \times 10^5 n^{3/2} A D^{1/2} v^{1/2} C^* \quad (\text{S1})$$

where  $i_p$  is the peak current (A),  $n$  is the number of transferred electrons,  $A$  is the area of the electrode ( $\text{cm}^2$ ),  $D$  is the diffusion coefficient ( $\text{cm}^2 \text{s}^{-1}$ ),  $v$  is the scan rate ( $\text{V s}^{-1}$ ) and  $C^*$  is the bulk concentration of the analyte ( $\text{mol cm}^{-3}$ ).

For adsorption-controlled reaction,  $i_p$  is directly proportional to  $v$ :<sup>9</sup>

$$i_p = (n^2 F^2 / 4RT) v A \Gamma^* \quad (\text{S2})$$

where,  $i_p$ ,  $n$ ,  $v$ , and  $A$  have the same meaning as in Equation S1,  $F$  is the Faraday's constant,  $R$  is the gas constant ( $\text{J mol}^{-1} \text{K}^{-1}$ ), and  $\Gamma^*$  ( $\text{mol cm}^{-2}$ ) is concentration of the analyte adsorbed on the surface of the electrode.

Accordingly,  $\log(i_p)$  vs.  $\log(v)$  was plotted in Fig. S7, which gave a slope of 0.54. As a result, it is concluded that the electrochemical reaction on  $\text{C@Ni}_3\text{S}_2\text{@MoS}_2$  nanorods is mainly controlled by diffusion.



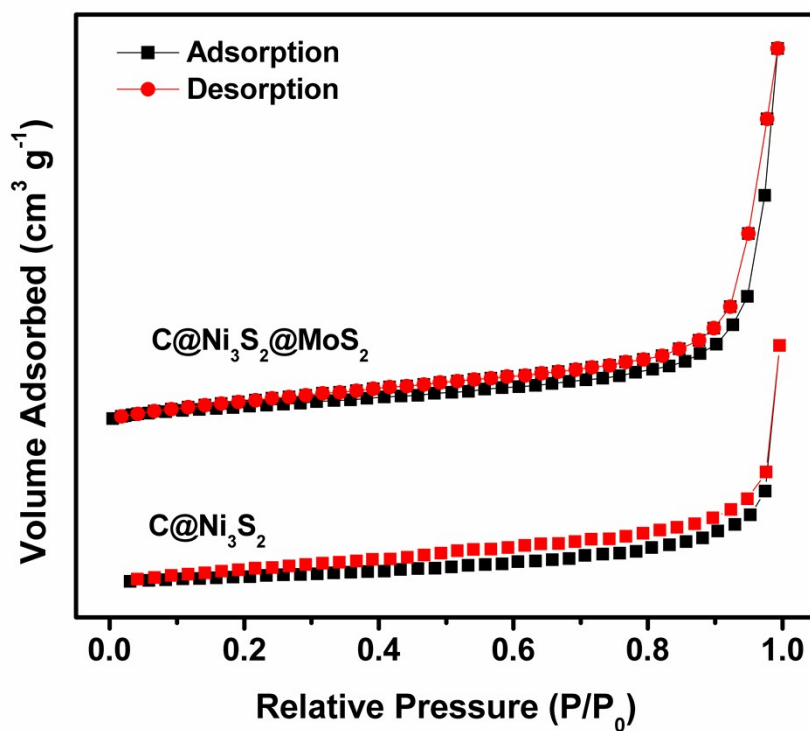

**Fig. S8** Nitrogen adsorption-desorption isotherms of C@Ni<sub>3</sub>S<sub>2</sub> and C@Ni<sub>3</sub>S<sub>2</sub>@MoS<sub>2</sub> nanorods.

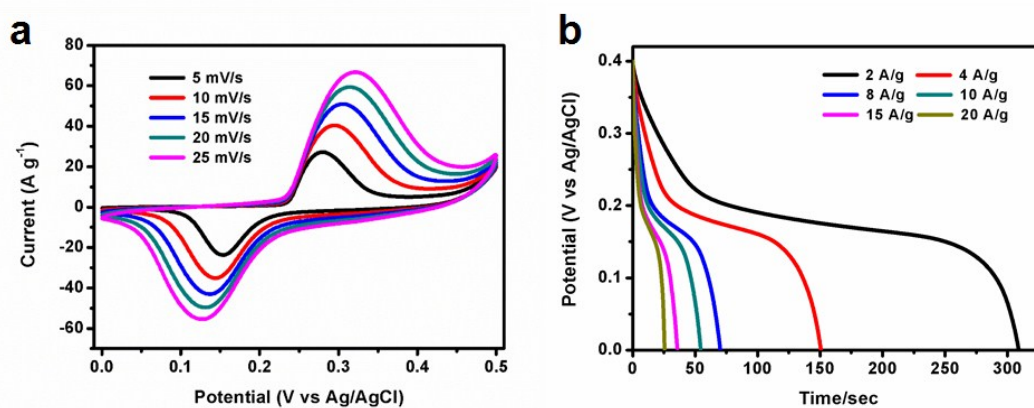

**Fig. S9** (a) CV curves at different scan rates, and (b) discharge curves at different current densities for C@Ni<sub>3</sub>S<sub>2</sub>@MoS<sub>2</sub> nanorod electrode.

### Detailed calculation of specific capacitance:

The specific capacitance can be calculated based on the following equation:

$$C = I \times \Delta t / (m \times \Delta V)$$

where,  $I/m$  (A/g) is the specific current density,  $\Delta t$  (t) is the discharging time,  $\Delta V$  (V) is the potential window for the charge-discharge process.

As shown in Fig. S9b, the discharging time of the  $C@Ni_3S_2@MoS_2$  nanorod electrode at a current density of 2 A/g is 308.9 s, the potential window is 0.4 V, so the specific capacitance can be calculated as:  $2 \times 308.9 / 0.4 = 1544.5$  F/g.

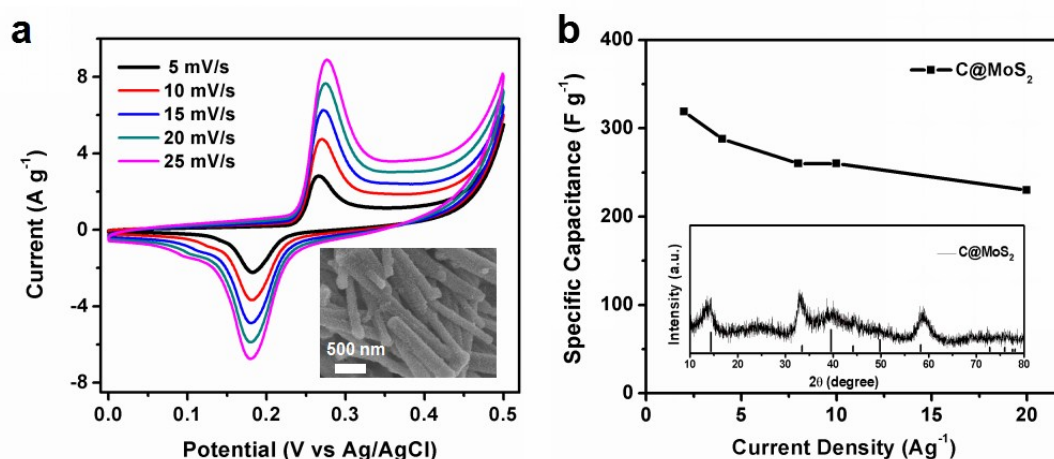

**Fig. S10** (a) CV curves at different scan rates, and (b) specific capacitance obtained at different current densities for  $C@MoS_2$  nanorods (the insets of (a) and (b) show SEM image and XRD pattern of  $C@MoS_2$ , respectively).

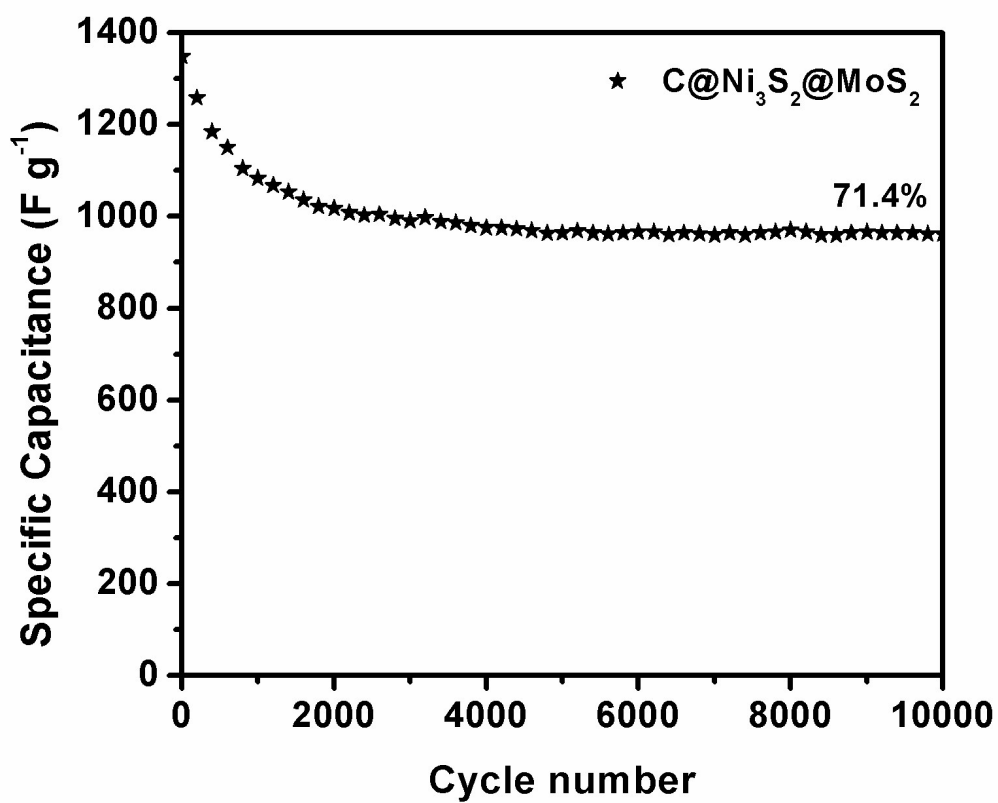

**Fig. S11** Long-term cycling performance for the  $\text{C@Ni}_3\text{S}_2\text{@MoS}_2$  nanorods at a current density of  $10 \text{ A g}^{-1}$ .

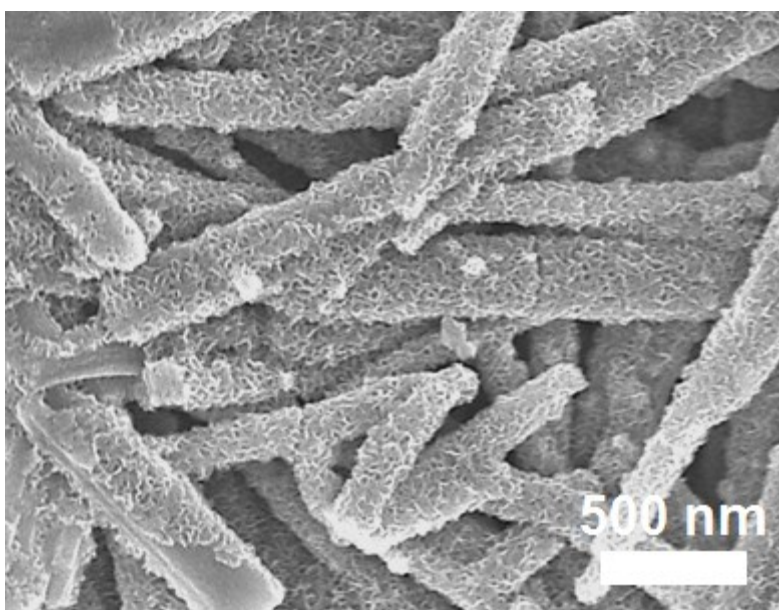

**Fig. S12** SEM image of  $\text{C@Ni}_3\text{S}_2\text{@MoS}_2$  after 2000 charging-discharging cycles at a current density of  $20 \text{ A/g}$ .

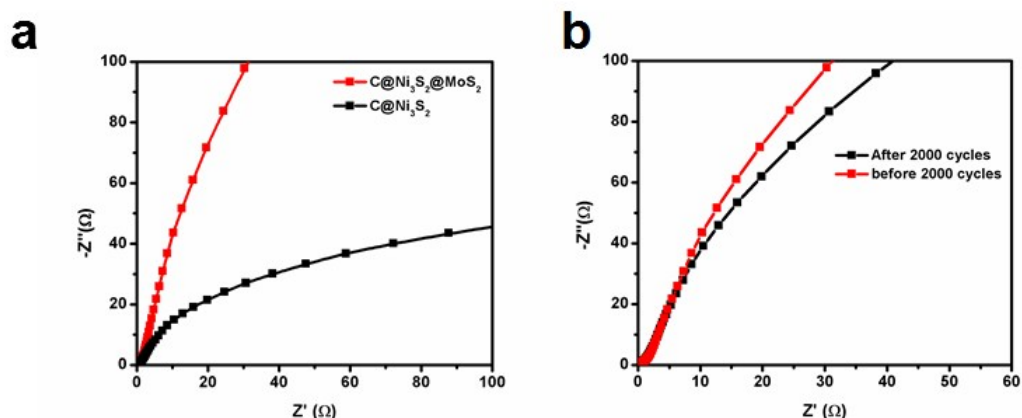

**Fig. S13** (a) Nyquist plots of C@Ni<sub>3</sub>S<sub>2</sub> and C@Ni<sub>3</sub>S<sub>2</sub>@MoS<sub>2</sub> nanorod electrodes, and (b) Nyquist plot of C@Ni<sub>3</sub>S<sub>2</sub>@MoS<sub>2</sub> nanorod electrode before and after 2000 charge-discharge cycles.

### Supplementary Reference

- 1 T. Zhu, H. B. Wu, Y. B. Wang, R. Xu and X. W. Lou, *Adv. Energy Mater.*, 2012, **2**, 1497-1502.
- 2 X.W. Ou, L.Gan and Z. T. Luo, *J. Mater. Chem. A*, 2014, **2**, 19214-19220.
- 3 J. P. Wang, S.L. Wang, Z. C. Huang and Y. M. Yu, *J. Mater. Chem. A*, 2014, **2**, 17595-17601.
- 4 D. Ghosh and C. K. Das, *ACS Appl.Mater. Interfaces*, 2015, **7**, 1122-1131.
- 5 Z. C. Xing, Q. X. Chu, X. B. Ren, C. J. Ge, A. H. Qusti, A. M. Asiri, A. O. Al-Youbi and X. P. Sun, *J. Power Sources*, 2014, **245**, 17595-467.
- 6 W. J. Zhou, X. H. Cao, Z. Y. Zeng, W. H. Shi, Y. Y. Zhu, Q. Y. Yan, H. Liu, J. Y. Wang and H. Zhang, *Energy Environ. Sci.*, 2013, **6**, 2216-2221.
- 7 Y. Zhang, W. P. Sun, X. H. Rui, B. Li, H. T. Tan, G. L. Guo, S. Madhavi, Y. Zong and Q. Y. Yan, *Small*, 2014, **11**, 3694-3702.
- 8 B. Xu, M. L. Ye, Y. X. Yu and W. D. Zhang, *Anal. Chim. Acta.*, 2010, **674**, 20-26.
- 9 L. A. Berben and J. C. Peters, *Chem. Commun.*, 2010, **46**, 398-400.
